# Supplementary material for: Simple modular systems for generation of droplets on demand
Source: Royal Society of Chemistry journal article supplement (doi:10.1039/c3lc50340b), 2013-01-01
Supplement: c3lc50340b.pdf [file c3lc50340b.pdf]

# Simple modular systems for generation of droplets on demand

Krzysztof Churski, Michal Nowacki, Piotr M. Korczyk and Piotr Garstecki\*

Institute of Physical Chemistry, Polish Academy of Sciences, Kasprzaka 44/52, Warsaw, Poland; E-mail: garst@ichf.edu.pl

5

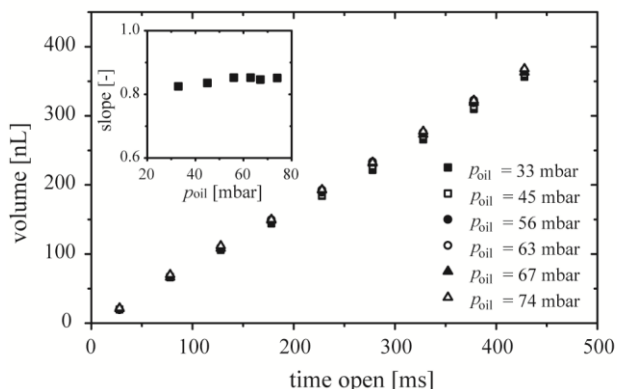

**Fig. S11** The dependence of the volume of droplets on 'time open' for five different pressures applied to the oil phase. Pressure applied to water was 100 bar.

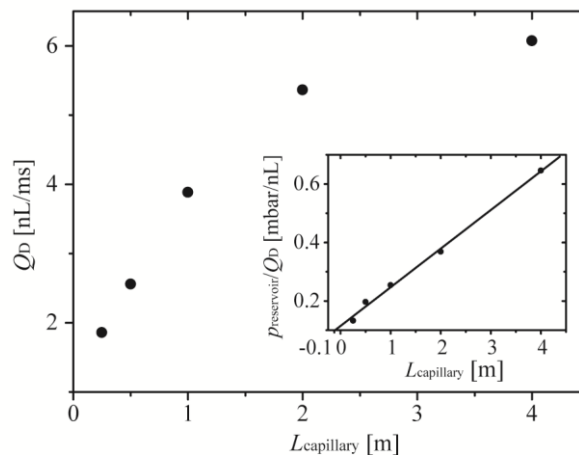

**Fig. S12** The dependence of  $Q_D$  on  $L_{\text{capillary}}$ . In the inset the dependence of  $p_{\text{reservoir}}/Q_D$  on  $L_{\text{capillary}}$  for linear parts of the evolution of volume of droplets in time, during their generation (Fig. 8). We determined  $R_{\text{chip}}$  (in 45 unit of capillary length) as an absolute value of the root of this function.

10 *Resistive capillary.* We recorded high speed videos of the tip of the droplet phase during the process of generation of a droplet. We showed the volume in the tip as a function of time (Fig. 8). We tuned constant ratio between  $p_{\text{reservoir}}$  and  $L$  ( $p_{\text{reservoir}} = L_{\text{capillary}} \cdot 0.1 \text{ bar m}^{-1}$ ) for each conditions of droplets generation, thus  
 15 volumes o droplets should be identical. We noticed that together with the increase of  $p_{\text{reservoir}}$  and  $L_{\text{capillary}}$ , droplets grow faster and them final volumes are higher. It results from neglected additional hydraulic resistance –  $R_{\text{chip}}$ . In order to eliminate the influence of  $R_{\text{chip}}$  on volumes of droplets we determined  $R_{\text{chip}}$  and  
 20 found the minimal ratio  $R_{\text{capillary}}/R_{\text{chip}}$ , which makes volumes of droplets independent on  $R_{\text{chip}}$ .

Fig. S12 shows dependence of  $Q_D$  on  $L_{\text{capillary}}$ . This relation strongly depends on  $L_{\text{capillary}}$  for short capillaries, what exhibits the influence of  $R_{\text{chip}}$  on the rate of flow of liquid in the chip.  
 25 Together with the increase of  $L_{\text{capillary}}$ ,  $Q_D$  asymptotically tends to be constant.

In order to find  $R_{\text{chip}}$  (actually  $L_{\text{chip}}$  – the hydraulic resistance of the chip in unit of capillary length) we rewrote Hagen-Poiseuille equation (with assumption that  $L_{\text{capillary}} \sim R_{\text{capillary}}$  and  $L_{\text{chip}} \sim R_{\text{chip}}$ ) as a  $L_{\text{capillary}} + L_{\text{chip}} \sim p_{\text{reservoir}}/Q_D$ . Temporary assuming that  $R_{\text{capillary}}/R_{\text{chip}} \gg 1$ , we plotted relation  $L_{\text{capillary}} \sim p_{\text{reservoir}}/Q_D$  (Fig. S12). If indeed  $Q_D$  on  $L_{\text{capillary}} \gg 1$ , this linear function will cross the coordinate system in the point (0,0). The shift of the  
 35 root of this function to negative values comes from influence of  $R_{\text{chip}}$  on the rate of flow of liquid in microchannels. Thus,  $L_{\text{chip}}$  (resistance of the chip in unit of capillary length) of the chip filled with a sequence of a few drops (c.a. 5-6 drops) is the absolute value of the root of this function. This calculation estimates  $R_{\text{chip}}$  to be equal to the hydraulic resistance of a steel capillary of the  
 40 inside diameter of 0.205 mm and of the length of 0.1 m.

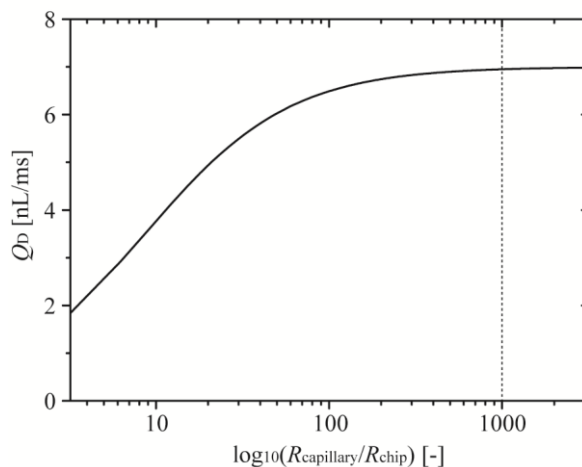

**Fig. S13** The theoretical dependence of  $Q_D$  on  $\log_{10}(R_{\text{capillary}}/R_{\text{chip}})$ . The ratio above  $10^3$  sufficiently eliminates the dependence of volume of droplet on  $R_{\text{chip}}$ .

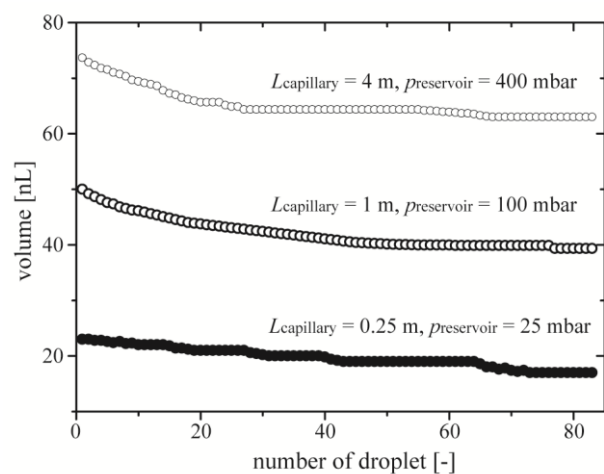

**Fig. S14** The decrease of volume of droplets as a result of the increase of the number of droplets in the microchannel. For each length of the capillary ( $L_{\text{capillary}} = 0.25, 1, 4 \text{ m}$ ) we applied the pressure  $p_{\text{reservoir}} = 5 L_{\text{capillary}} \cdot 0.1 \text{ bar m}^{-1}$ .

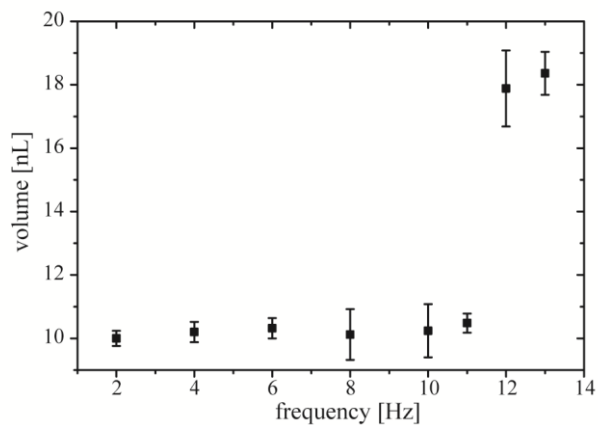

**Fig. S15** The dependence of the volume of droplets on the frequency of their generation in the system operated with a squeeze valve. Time open of the valve 8 ms, the pressure applied to water is 100 mbar.
